# Supplementary material
Source: ML conference proceedings conference paper supplement (https://openreview.net/forum?id=RqI2i7HEJ8)
Supplement: supplementary_material [file attachment]

# Supplementary Materials: Novel LiDAR View Synthesis via Neural Radiance Fields

Anonymous Authors

## A LIMITATIONS AND FUTURE WORK.

As this paper is the first attempt at novel LiDAR view synthesis, there remains room for improvement. Our LiDAR-NeRF draws inspiration from the original NeRF formalism. As such, it is better suited to static scenes, and requires per-scene optimization. Fortunately, much progress is being made in handling dynamic scenes [2, 8, 9] and generalization [10, 12] in image-based NeRF, and we expect these advances to facilitate the development of counterparts for novel LiDAR view synthesis. Note that, in this work, we have considered the problem of synthesizing LiDAR data only, but jointly rendering LiDAR and images is a natural step forward. We therefore plan to extend our NeRF-MVL dataset to a multimodal one. Moreover, we are integrating various LiDAR renderers, including LiDAR simulators and our proposed LiDAR-NeRF framework, with the goal of developing a unified Codebase for novel LiDAR view synthesis that can benefit the community. Altogether, we hope that our work will inspire other researchers to contribute to the development of novel LiDAR view synthesis.

## B ADDITIONAL DETAILS

### B.1 Ablation details

All ablation experiments were conducted on the seq-1908-1971 of the KITTI-360 dataset, which is a large, clear scene with numerous objects, making it an ideal sequence for comparison.

### B.2 Baseline details

As generating novel LiDAR views remains unexplored, we moderately adapt existing model-based LiDAR simulators as our baseline. Given a sequence of LiDAR frames, the objective is to generate novel LiDAR scenes with realistic geometry. In essence, the baseline, summarized in Fig. 1, follows the physics-based, multi-step approach of existing simulation pipelines [6, 7]. In short, they first gather a set of LiDAR frames, which are transformed into the global world coordinate system. The resulting aligned dense 3D scene or mesh is projected to the novel view via ray-casting. Finally, the problem of LiDAR ray-dropping is simulated to improve realism. Because the official codes of LiDARsim [7] and PCGen [6] are not publicly available, we re-implemented them following the papers as closely as possible. Below, we discuss the implementation in more detail.

**B.2.1 LiDARsim. Point cloud meshing and mesh-ray intersection.** Following LiDARsim [7], our pipeline also consists of two steps: point cloud meshing and mesh-ray intersection. The point cloud meshing step is implemented based on the Poisson surface reconstruction algorithm [3], which is a modification from the original author’s Surfel-based meshing. The mesh-ray intersection step is implemented based on Intel Embree using the Open3D library [14]. The performance of Poisson surface reconstruction is sensitive to hyperparameters, namely the maximum depth of the

tree and the weight threshold for selecting mesh vertices. For each dataset, we perform grid search of these two parameters on the training set and select the best-performing one on the test set.

**Ray-drop network.** To train the ray-drop network, following LiDARsim [7], we concatenate range, intensity, incidence angle (in cosine), and the normal of surface hit as inputs. We then train a U-Net with 4 down-sampling (with 64, 128, 256, and 512 channels respectively) and 4 up-sampling layers (with 1024, 512, 256, and 128 channels respectively) to predict the ray-drop mask. We train on the training frames for 10 epochs. The final range image prediction is the ray-casted results multiplied by the ray-drop mask. We use this final range image for evaluation.

**B.2.2 PCGen. Ray-casting.** Ray-casting defines the intersections between the laser beams and the dense point cloud. The standard approach is closest-point (CP) ray-casting [5], which projects the dense point cloud to a range image, and, for each ray, selects the point with the smallest measured distance, as is commonly done in rendering pipelines with the so-called z-buffer. In real-world scenarios, however, the calibration, sensor synchronization, and other properties [13] are affected by different noise sources, and the points in the dense point cloud do not strictly lie on the scene surface. Thus, considering only the closest point tends to render noisy ray-casted point clouds and more points in the z-buffer need to be taken into account. PCGen [6] propose the first peak averaging (FPA) raycasting, averaging the points within a certain threshold near the closest point, and weighting them by their inverse distance.

**Ray-drop network.** Ray-casting yields a nearly perfect point cloud in the novel view. However, the laser returns of a real LiDAR sensor are affected by many factors, such as the distance to the scene, the incidence angle, and the material texture and reflectivity. To improve realism, we follow from PCGen [6] to employ a small surrogate MLP to learn the ray-drop, which we dub ray-drop MLP. Specifically, we model a ray’s return probability as  $p = \text{MLP}(\theta', d, i)$ , where  $\theta'$ ,  $d$ , and  $i$  are the viewing direction in the local coordinate system, the distance, and the intensity of the ray. For the implementation of ray-drop MLP, it has 4 layers with a width of 128. It is trained with Adam [4] with a learning rate of  $5e-3$ , and supervised with MSE loss for 10k iterations with a batch size of 2048.

## C ADDITIONAL EXPERIMENTAL RESULTS

### C.1 More ablations of LiDAR-NeRF.

**LiDAR-NeRF (w NeRF).** We ablate the training strategies of our LiDAR-NeRF (w NeRF) in Table 1. In the training process, we scale (Scale) the scene frames with a factor such that the region of interest falls within a unit cube. There is also a parameterization function (contract) used in [1, 11] as:

$$\text{contract}(x) = \begin{cases} x/r, & \text{if } \|x\| \leq r, \\ (1 + b - \frac{br}{\|x\|}) \frac{x}{\|x\|}, & \text{otherwise.} \end{cases} \quad (1)$$

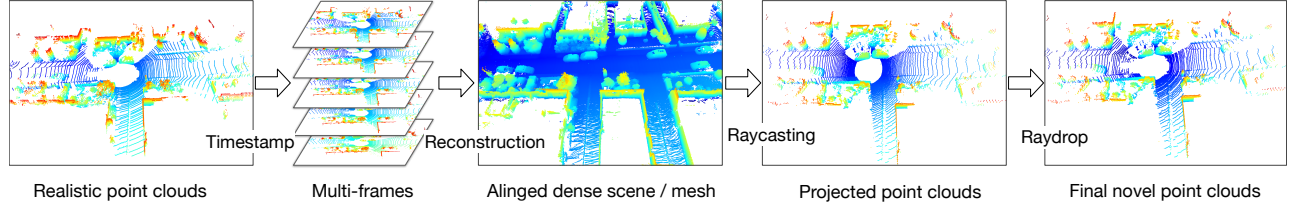

Figure 1: Baseline multi-step LiDAR simulator pipeline.

Table 1: Ablation of LiDAR-NeRF (w NeRF) training strategies.

| Scale | Contract | Cos-lr | C-D↓  | F-score↑ | RMSE↓ | $\delta_1$ ↑ | $\delta_2$ ↑ | $\delta_3$ ↑ | SSIM↑ | MAE↓  |
|-------|----------|--------|-------|----------|-------|--------------|--------------|--------------|-------|-------|
| ✗     | ✗        | ✓      | 132.4 | 00.19    | 9.910 | 00.07        | 00.62        | 2.087        | 0.296 | 0.491 |
| ✗     | ✓        | ✓      | 0.129 | 87.08    | 3.849 | 79.63        | 81.09        | 81.64        | 0.575 | 0.231 |
| ✓     | ✗        | ✗      | 0.146 | 84.07    | 3.978 | 77.81        | 79.33        | 79.81        | 0.549 | 0.225 |
| ✓     | ✗        | ✓      | 0.126 | 87.64    | 3.948 | 78.26        | 79.57        | 80.09        | 0.555 | 0.226 |

Where  $r$  and  $b$  are the radius parameters to decide the mapping boundary. We set  $r = 10$  and  $b = 1$  for the scene point clouds. As expected, without the parameterization function, the model hardly learned anything. While the 'Scale' and 'Contract' functions achieve comparable results. Moreover, we employ a cosine schedule with one thousand iterations to warm up the learning rate (Cos-lr) to stable training, which slightly improves the performance.

## C.2 More ablations of baseline.

For exhaustive evaluation and fair comparisons, we also validate different settings of the baseline methods as follows. In Table 2, we investigate the different components of baseline simulators.

**LiDARsim.** For LiDARsim [7], the ray-drop U-Net can both boost the performance and demonstrate its effectiveness.

**PCGen.** For PCGen [6], the FPA z-buffer ray-casting and ray-drop MLP can both boost the performance and demonstrate their effectiveness.

It is worth noting that training the ray-drop network necessitates considerable effort, entailing the initial rendering of training sets, followed by the construction of paired training sets for the ray-drop network, comprising the rendered outcomes and their corresponding ground truth. Subsequently, it is imperative to meticulously adjust the model's architecture and training parameters to achieve superior results for each scene or object.

## C.3 More results.

**KITTI-360 dataset.** We report detailed results on the four sequences of the KITTI-360 dataset in Table 3. Our LiDAR-NeRF consistently outperforms the baseline over all sequences in all metrics.

**NeRF-MVL dataset.** We report detailed results on nine object categories of NeRF-MVL dataset in Table 4. Our LiDAR-NeRF consistently outperforms the baseline over all categories in all metrics.

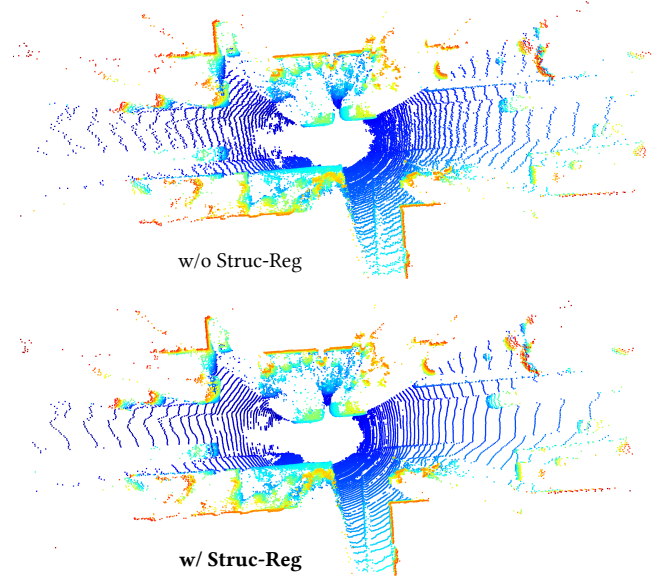

Figure 2: Our structural regularization significantly improves the geometry estimation and produces more realistic LiDAR patterns.

## D ADDITIONAL QUALITATIVE VISUALIZATION.

**Structural regularization.** Our structural regularization significantly improves the geometry estimation and produces more realistic LiDAR patterns as shown in Fig. 2

**Scene editing.** As our LiDAR-NeRF can effectively synthesize novel LiDAR views at both scene level and object level, it can be exploited to achieve scene editing. We provide an example for novel scene arrangements, which corresponds to editing the scene from the KITTI-360 dataset by fusing novel objects from our NeRF-MVL

**Table 2: Ablation of baseline simulators.**

| Method       | Component         | C-D↓  | F-score↑ | RMSE↓ | $\delta 1$ ↑ | $\delta 2$ ↑ | $\delta 3$ ↑ | SSIM↑ | MAE↓  |
|--------------|-------------------|-------|----------|-------|--------------|--------------|--------------|-------|-------|
| LiDARsim [7] | Mesh ray-casting  | 1.026 | 64.62    | 5.674 | 52.09        | 57.90        | 60.15        | 0.592 | 0.156 |
|              | + Ray-drop U-Net  | 0.981 | 66.77    | 5.404 | 67.33        | 72.70        | 74.76        | 0.711 | 0.122 |
| PCGen [6]    | CP ray-casting    | 0.259 | 83.87    | 4.312 | 65.06        | 67.86        | 69.09        | 0.153 | 0.274 |
|              | + FPA ray-casting | 0.248 | 85.43    | 4.332 | 65.21        | 67.93        | 69.13        | 0.155 | 0.280 |
|              | + Ray-drop MLP    | 0.220 | 87.75    | 4.029 | 77.35        | 79.95        | 81.05        | 0.220 | 0.238 |

**Table 3: More results of novel LiDAR view synthesis on KITTI-360. LiDAR-NeRF outperforms the baseline over all sequences in all metrics.**

| Sequence                                 | C-D↓  | F-score↑ | RMSE↓ | $\delta 1$ ↑ | $\delta 2$ ↑ | $\delta 3$ ↑ | SSIM↑ | MAE↓  |
|------------------------------------------|-------|----------|-------|--------------|--------------|--------------|-------|-------|
| <b>LiDARsim [7]</b>                      |       |          |       |              |              |              |       |       |
| Seq 1538–1601                            | 0.794 | 72.13    | 5.455 | 67.49        | 73.68        | 78.17        | 0.719 | 0.125 |
| Seq 1728–1791                            | 0.819 | 65.38    | 6.083 | 67.20        | 70.86        | 74.11        | 0.694 | 0.122 |
| Seq 1908–1971                            | 0.981 | 66.77    | 5.404 | 67.33        | 72.70        | 74.76        | 0.711 | 0.122 |
| Seq 3353–3416                            | 1.211 | 63.29    | 6.038 | 63.35        | 67.20        | 70.64        | 0.660 | 0.133 |
| Average                                  | 0.951 | 66.89    | 5.745 | 66.34        | 71.11        | 74.42        | 0.696 | 0.126 |
| <b>PCGen [6]</b>                         |       |          |       |              |              |              |       |       |
| Seq 1538–1601                            | 0.159 | 88.64    | 4.091 | 75.64        | 79.62        | 82.08        | 0.558 | 0.254 |
| Seq 1728–1791                            | 0.194 | 83.87    | 4.560 | 76.19        | 79.37        | 81.35        | 0.545 | 0.243 |
| Seq 1908–1971                            | 0.220 | 87.75    | 4.029 | 77.35        | 79.95        | 81.05        | 0.559 | 0.238 |
| Seq 3353–3416                            | 0.173 | 88.37    | 4.633 | 78.40        | 79.92        | 81.05        | 0.536 | 0.244 |
| Average                                  | 0.187 | 87.16    | 4.328 | 76.90        | 79.72        | 81.38        | 0.550 | 0.245 |
| <b>LiDAR-NeRF (w/ NeRF)</b>              |       |          |       |              |              |              |       |       |
| Seq 1538–1601                            | 0.148 | 84.88    | 4.007 | 76.66        | 79.09        | 79.85        | 0.527 | 0.242 |
| Seq 1728–1791                            | 0.148 | 83.88    | 4.207 | 78.44        | 80.35        | 81.09        | 0.549 | 0.239 |
| Seq 1908–1971                            | 0.126 | 87.64    | 3.948 | 78.26        | 79.57        | 80.09        | 0.555 | 0.226 |
| Seq 3353–3416                            | 0.150 | 87.31    | 4.039 | 79.15        | 80.14        | 80.63        | 0.550 | 0.233 |
| Average                                  | 0.143 | 85.93    | 4.050 | 78.13        | 79.79        | 80.42        | 0.545 | 0.235 |
| <b>LiDAR-NeRF (w/ iNGP and StrucReg)</b> |       |          |       |              |              |              |       |       |
| Seq 1538–1601                            | 0.073 | 92.55    | 3.530 | 80.76        | 82.71        | 83.52        | 0.597 | 0.102 |
| Seq 1728–1791                            | 0.088 | 90.95    | 3.766 | 82.91        | 84.26        | 84.91        | 0.646 | 0.091 |
| Seq 1908–1971                            | 0.077 | 92.98    | 3.511 | 82.25        | 83.28        | 83.73        | 0.635 | 0.096 |
| Seq 3353–3416                            | 0.086 | 93.46    | 3.654 | 82.78        | 83.36        | 83.71        | 0.625 | 0.094 |
| Average                                  | 0.081 | 92.49    | 3.615 | 82.18        | 83.40        | 83.97        | 0.626 | 0.096 |

dataset. Given the 6D pose (3D translation and yaw, pitch, and roll rotations) of the new object, we first render the corresponding novel view of the object, and then paste it to the desired position in the scene. Furthermore, it is worth mentioning that our method has the capability to adjust the intrinsics of LiDAR, thereby addressing the issue of inconsistent LiDAR patterns resulting from the use of different LiDAR devices in the NeRF-MVL and KITTI-360 datasets. As illustrated in Fig. 3, our LiDAR-NeRF can render the corresponding novel view, and the yield augmented scene has realistic occlusion effects and a consistent LiDAR pattern, compared with the common

cope-paste strategy. We provide more visualizations in the video in the supplementary material.

**Qualitative results on KITTI-360.** We provide more qualitative results on KITTI-360 dataset in Fig. 4, which shows that our LiDAR-NeRF produces high-quality point clouds fidelity with the ground truth.

**Video demo.** In addition to the figures, we have attached a video demo in the supplementary materials, which consists of hundreds of frames that provide a more comprehensive evaluation of our proposed approach.

**Table 4: Novel LiDAR view synthesis on NeRF-MVL. Our LiDAR-NeRF outperforms the baseline in all metrics.**

| Object-Category                    | C-D↓  | F-score↑ | RMSE↓ | $\delta 1$ ↑ | $\delta 2$ ↑ | $\delta 3$ ↑ | SSIM↑ | MAE↓  |
|------------------------------------|-------|----------|-------|--------------|--------------|--------------|-------|-------|
| <b><i>LiDARsim [7]</i></b>         |       |          |       |              |              |              |       |       |
| Bollard                            | 0.011 | 98.92    | 5.751 | 84.64        | 84.64        | 84.64        | 0.518 | 2.172 |
| Car                                | 0.067 | 94.06    | 6.331 | 82.35        | 82.37        | 82.37        | 0.645 | 1.426 |
| Pedestrian                         | 0.011 | 97.91    | 4.788 | 90.20        | 90.20        | 90.20        | 0.748 | 4.353 |
| Pier                               | 0.016 | 95.33    | 6.606 | 78.67        | 78.67        | 78.67        | 0.510 | 2.541 |
| Plant                              | 0.018 | 93.81    | 5.315 | 86.45        | 86.45        | 86.45        | 0.667 | 0.852 |
| Safety barrier                     | 0.015 | 97.95    | 6.697 | 78.29        | 78.29        | 78.29        | 0.565 | 5.801 |
| Tire                               | 0.021 | 95.45    | 6.936 | 75.53        | 75.53        | 75.53        | 0.566 | 0.457 |
| Traffic cone                       | 0.013 | 99.59    | 5.861 | 88.14        | 88.14        | 88.14        | 0.628 | 19.14 |
| Warning sign                       | 0.024 | 91.05    | 5.569 | 86.57        | 86.57        | 86.57        | 0.663 | 0.546 |
| Average                            | 0.022 | 96.01    | 5.984 | 83.43        | 83.43        | 83.43        | 0.612 | 4.143 |
| <b><i>PCGen [6]</i></b>            |       |          |       |              |              |              |       |       |
| Bollard                            | 0.021 | 96.71    | 9.928 | 57.43        | 57.43        | 57.43        | 0.082 | 4.046 |
| Car                                | 0.446 | 72.23    | 5.829 | 86.37        | 86.37        | 86.37        | 0.331 | 0.123 |
| Pedestrian                         | 0.063 | 92.43    | 4.364 | 92.61        | 92.61        | 92.61        | 0.472 | 6.073 |
| Pier                               | 0.017 | 96.92    | 9.534 | 58.11        | 58.11        | 58.11        | 0.088 | 4.557 |
| Plant                              | 0.021 | 91.33    | 6.729 | 76.26        | 76.26        | 76.26        | 0.280 | 1.475 |
| Safety barrier                     | 0.070 | 74.88    | 5.382 | 87.33        | 87.33        | 87.33        | 0.207 | 5.689 |
| Tire                               | 0.026 | 94.84    | 8.748 | 62.58        | 62.58        | 62.58        | 0.095 | 0.714 |
| Traffic cone                       | 0.014 | 98.52    | 8.698 | 71.80        | 71.80        | 71.80        | 0.223 | 32.26 |
| Warning sign                       | 0.020 | 95.77    | 8.810 | 65.72        | 65.72        | 65.72        | 0.171 | 1.472 |
| Average                            | 0.078 | 90.40    | 7.558 | 73.13        | 73.13        | 73.13        | 0.217 | 6.268 |
| <b><i>LiDAR-NeRF (w/ NeRF)</i></b> |       |          |       |              |              |              |       |       |
| Bollard                            | 0.028 | 90.48    | 3.805 | 93.56        | 93.56        | 93.56        | 0.245 | 0.426 |
| Car                                | 0.033 | 92.77    | 4.044 | 93.14        | 93.14        | 93.14        | 0.544 | 0.457 |
| Pedestrian                         | 0.018 | 96.33    | 3.299 | 95.70        | 95.70        | 95.70        | 0.627 | 6.454 |
| Pier                               | 0.014 | 96.68    | 3.701 | 93.52        | 93.52        | 93.52        | 0.353 | 0.837 |
| Plant                              | 0.019 | 96.30    | 3.349 | 95.02        | 95.02        | 95.02        | 0.571 | 0.472 |
| Safety barrier                     | 0.045 | 89.59    | 3.693 | 93.87        | 93.87        | 93.87        | 0.517 | 4.070 |
| Tire                               | 0.039 | 89.52    | 3.640 | 93.27        | 93.27        | 93.27        | 0.448 | 0.100 |
| Traffic cone                       | 0.026 | 92.72    | 4.747 | 92.66        | 92.66        | 92.66        | 0.428 | 10.88 |
| Warning sign                       | 0.033 | 90.87    | 4.296 | 92.62        | 92.62        | 92.62        | 0.424 | 0.082 |
| Average                            | 0.028 | 92.81    | 3.864 | 93.65        | 93.65        | 93.65        | 0.462 | 2.642 |
| <b><i>LiDAR-NeRF (w/ iNGP)</i></b> |       |          |       |              |              |              |       |       |
| Bollard                            | 0.007 | 98.54    | 0.974 | 99.13        | 99.13        | 99.13        | 0.786 | 0.723 |
| Car                                | 0.005 | 99.33    | 2.256 | 97.85        | 97.85        | 97.85        | 0.842 | 0.436 |
| Pedestrian                         | 0.001 | 99.97    | 1.381 | 99.24        | 99.24        | 99.24        | 0.941 | 1.650 |
| Pier                               | 0.004 | 98.14    | 1.047 | 99.08        | 99.08        | 99.08        | 0.889 | 0.671 |
| Plant                              | 0.001 | 99.36    | 0.415 | 99.80        | 99.80        | 99.80        | 0.976 | 0.464 |
| Safety barrier                     | 0.018 | 92.41    | 2.624 | 96.63        | 96.63        | 96.63        | 0.622 | 2.640 |
| Tire                               | 0.001 | 100.0    | 0.563 | 99.64        | 99.64        | 99.64        | 0.965 | 0.174 |
| Traffic cone                       | 0.002 | 100.0    | 1.221 | 99.32        | 99.32        | 99.32        | 0.949 | 2.493 |
| Warning sign                       | 0.006 | 98.77    | 1.266 | 99.13        | 99.13        | 99.13        | 0.948 | 0.259 |
| Average                            | 0.005 | 98.50    | 1.305 | 98.86        | 98.86        | 98.86        | 0.879 | 1.057 |



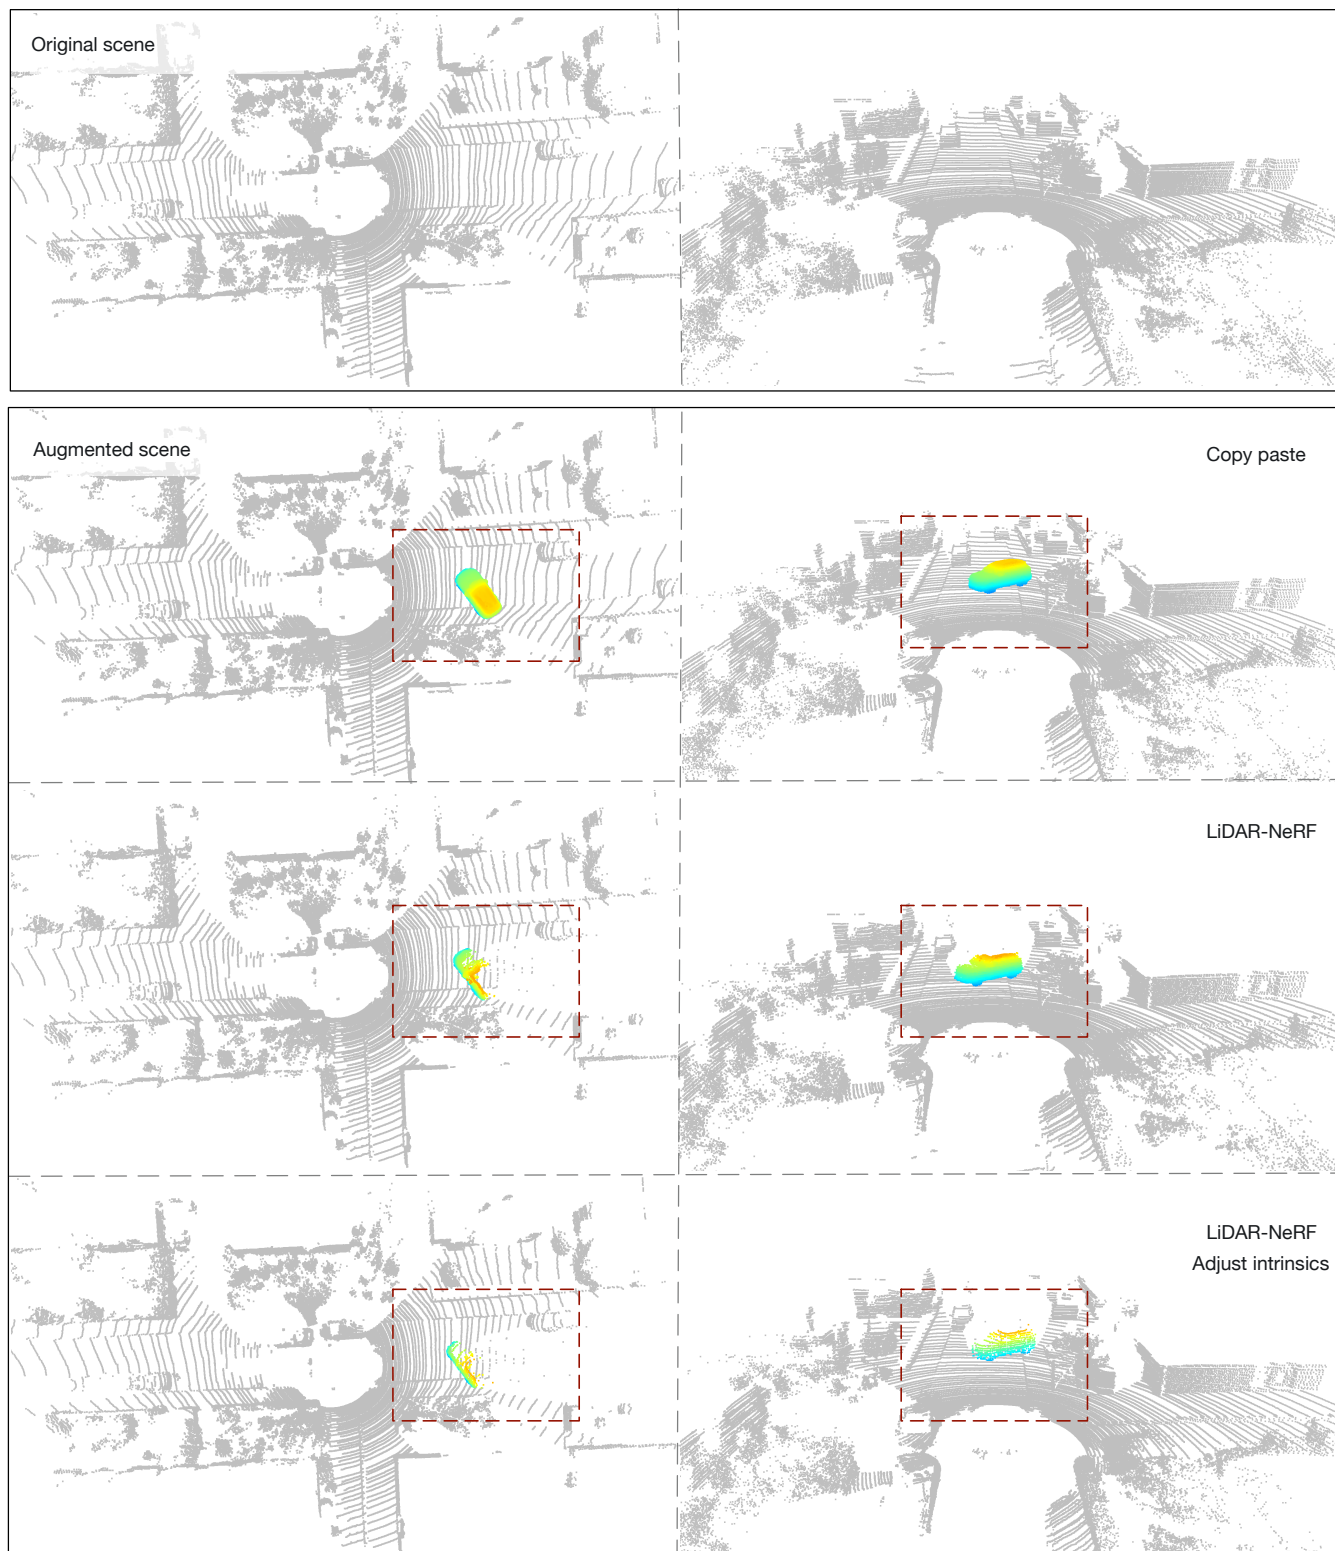

**Figure 3: Scene editing.** The augmented scene from our LiDAR-NeRF has realistic occlusion effects and consistent LiDAR pattern thanks to our differentiable LiDAR rendering formalism, compared with the common cope-paste strategy.

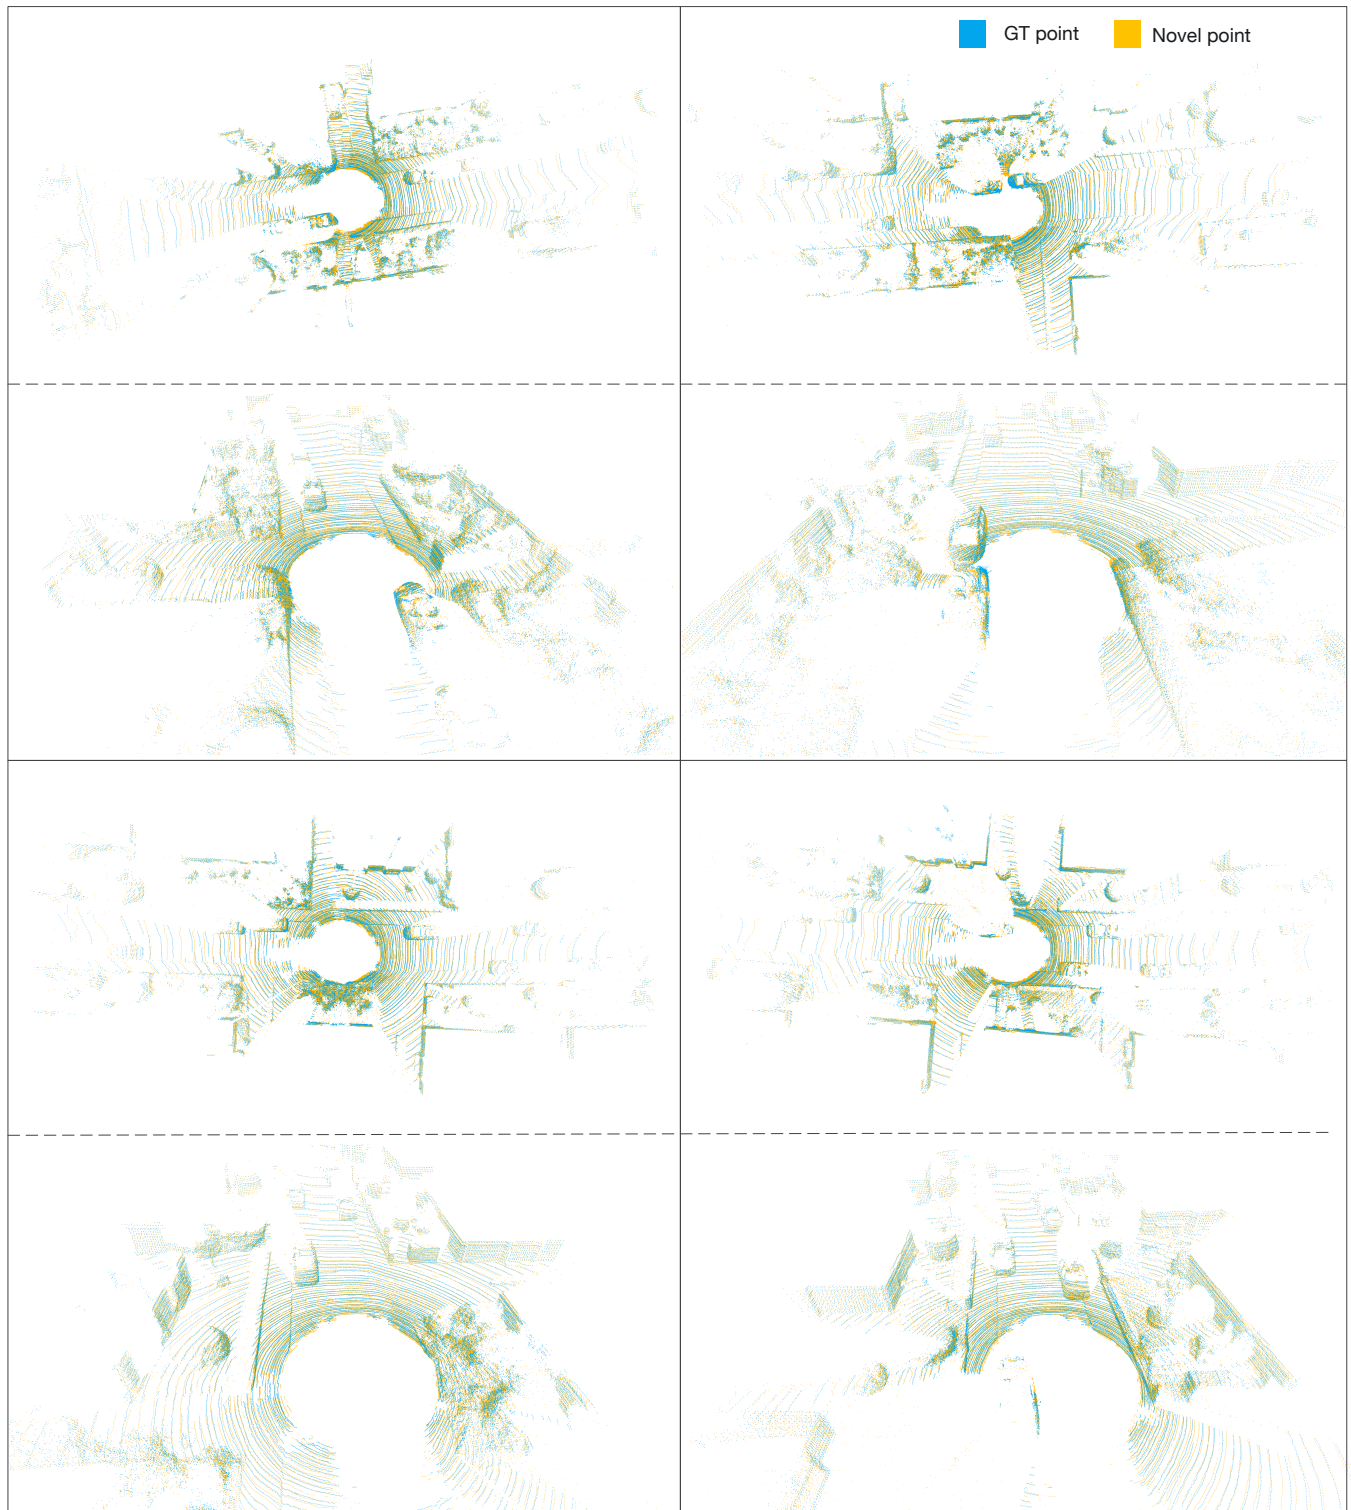

**Figure 4: Qualitative results on KITTI-360. The high quality of the results from different view-points demonstrates the effectiveness of our method.**

## REFERENCES

- [1] Jonathan T Barron, Ben Mildenhall, Matthew Tancik, Peter Hedman, Ricardo Martin-Brualla, and Pratul P Srinivasan. Mip-nerf: A multiscale representation for anti-aliasing neural radiance fields. In *Proceedings of the IEEE/CVF International Conference on Computer Vision*, pages 5855–5864, 2021.
- [2] Hankyu Jang and Daeyoung Kim. D-tensorf: Tensorial radiance fields for dynamic scenes. *arXiv preprint arXiv:2212.02375*, 2022.
- [3] Michael Kazhdan, Matthew Bolitho, and Hugues Hoppe. Poisson surface reconstruction. In *Proceedings of the fourth Eurographics symposium on Geometry processing*, volume 7, page 0, 2006.
- [4] Diederik P Kingma and Jimmy Ba. Adam: A method for stochastic optimization. *arXiv preprint arXiv:1412.6980*, 2014.
- [5] Ferdinand Langer, Andres Milioto, Alexandre Haag, Jens Behley, and Cyrill Stachniss. Domain transfer for semantic segmentation of lidar data using deep neural networks. In *2020 IEEE/RSJ International Conference on Intelligent Robots and Systems (IROS)*, pages 8263–8270. IEEE, 2020.
- [6] Chenqi Li, Yuan Ren, and Bingbing Liu. Pcgcn: Point cloud generator for lidar simulation. *arXiv preprint arXiv:2210.08738*, 2022.
- [7] Sivabalan Manivasagam, Shenlong Wang, Kelvin Wong, Wenyuan Zeng, Mikita Sazanovich, Shuhan Tan, Bin Yang, Wei-Chiu Ma, and Raquel Urtasun. Lidarsim: Realistic lidar simulation by leveraging the real world. In *Proceedings of the IEEE/CVF Conference on Computer Vision and Pattern Recognition*, pages 11167–11176, 2020.
- [8] Julian Ost, Fahim Mannan, Nils Thuerey, Julian Knodt, and Felix Heide. Neural scene graphs for dynamic scenes. In *Proceedings of the IEEE/CVF Conference on Computer Vision and Pattern Recognition*, pages 2856–2865, 2021.
- [9] Albert Pumarola, Enric Corona, Gerard Pons-Moll, and Francesc Moreno-Noguer. D-nerf: Neural radiance fields for dynamic scenes. In *Proceedings of the IEEE/CVF Conference on Computer Vision and Pattern Recognition*, pages 10318–10327, 2021.
- [10] Alex Trevithick and Bo Yang. Grf: Learning a general radiance field for 3d representation and rendering. In *Proceedings of the IEEE/CVF International Conference on Computer Vision*, pages 15182–15192, 2021.
- [11] Ziyang Xie, Junge Zhang, Wenye Li, Feihu Zhang, and Li Zhang. S-nerf: Neural radiance fields for street views. *arXiv preprint arXiv:2303.00749*, 2023.
- [12] Alex Yu, Vickie Ye, Matthew Tancik, and Angjoo Kanazawa. pixelnerf: Neural radiance fields from one or few images. In *Proceedings of the IEEE/CVF Conference on Computer Vision and Pattern Recognition*, pages 4578–4587, 2021.
- [13] Kaicheng Yu, Tang Tao, Hongwei Xie, Zhiwei Lin, Zhongwei Wu, Zhongyu Xia, Tingting Liang, Haiyang Sun, Jiong Deng, Dayang Hao, et al. Benchmarking the robustness of lidar-camera fusion for 3d object detection. *arXiv preprint arXiv:2205.14951*, 2022.
- [14] Qian-Yi Zhou, Jaesik Park, and Vladlen Koltun. Open3d: A modern library for 3d data processing. *arXiv preprint arXiv:1801.09847*, 2018.
